# Supplementary material for: A fluorescent sensor based on the cascade signal amplification strategy for ultra-sensitive detection of Cu2+
Source: Royal Society of Chemistry journal article supplement (doi:10.1039/d2nr06539h), 2022-12-23
Supplement: d2nr06539h1.pdf [file d2nr06539h1.pdf]

# Fluorescence Sensor based on Cascade Signal Amplification Strategy for Ultra-sensitive detection of $\text{Cu}^{2+}$

Ruijia Huang,<sup>a,b</sup> Ying Xu,<sup>b</sup> Jihui Du,<sup>a</sup> Qiong Guan,<sup>b</sup> Xiaoqing Cai,<sup>b</sup> Feng Li,<sup>b</sup> Jidong Wang,<sup>a\*</sup> and Wenwen Chen<sup>b\*</sup>

<sup>a</sup>. Medical Research Center, Huazhong University of Science and Technology Union Shenzhen Hospital, the 6th Affiliated Hospital, Shenzhen University Medical School, Shenzhen 518052, P. R. China

<sup>b</sup>. School of Biomedical Engineering, Shenzhen University Medical School, Shenzhen 518060, P. R. China

## Supporting Information

|                                                                                                                                                                                   |    |
|-----------------------------------------------------------------------------------------------------------------------------------------------------------------------------------|----|
| 1. FDTD simulation of AgNI and AuNR.....                                                                                                                                          | 4  |
| 2. SEM image of AgNIs.....                                                                                                                                                        | 5  |
| 3. TEM images of CTAB coated AuNRs and polymer coated AuNRs.....                                                                                                                  | 6  |
| 4. UV-Vis spectrums and Zeta-potential of CTAB-coated AuNRs and polymer-coated AuNRs.                                                                                             | 7  |
| 5. Optimization of AuNRs coating times for the fabrication of plasmonic substrate.....                                                                                            | 8  |
| 6. SEM image and EDS mappings of AuNRs/AgNIs substrate. ....                                                                                                                      | 9  |
| 7. Fluorescence curves with the concentrations of alkynyl added.....                                                                                                              | 10 |
| 8. Fluorescence curves under different pH. ....                                                                                                                                   | 11 |
| 9. Click-chemistry-based fluorescence probes for Cu <sup>2+</sup> detection.....                                                                                                  | 12 |
| 10. Drying Temperature.....                                                                                                                                                       | 13 |
| 11. Correlation analysis. ....                                                                                                                                                    | 14 |
| 12. Competitive effect for adsorbing Cu <sup>2+</sup> by the <i>E. coli</i> . ....                                                                                                | 15 |
| 13. Influence of different concentrations of Cef-susceptible <i>E. coli</i> and Cef-resistant <i>E. coli</i> for sensing system containing different amounts of copper ions. .... | 16 |
| <b>Table S1.</b> Urinary copper detection by our sensor and ICP-MS.....                                                                                                           | 17 |
| <b>Table S2.</b> Clinical UTI samples used in this study.. ....                                                                                                                   | 18 |
| <b>Table S3.</b> Sensitivity and Specificity of AST for UTI samples using our sensor.....                                                                                         | 20 |

1. FDTD simulation of AgNI and AuNR.

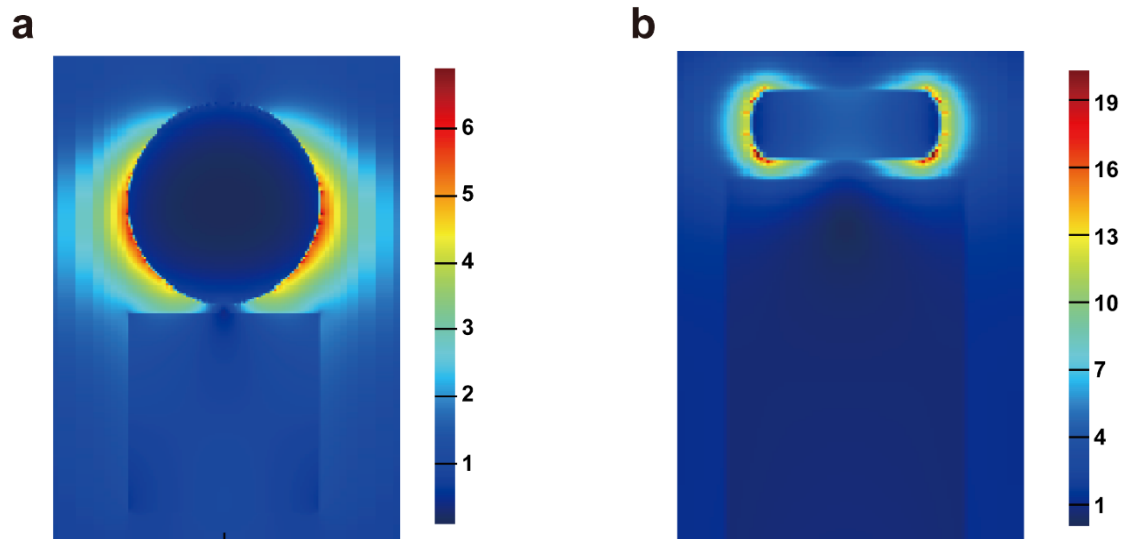

**Figure S1.** FDTD simulation of (a) AgNI and (b) AuNR.

2. SEM image of AgNIs.

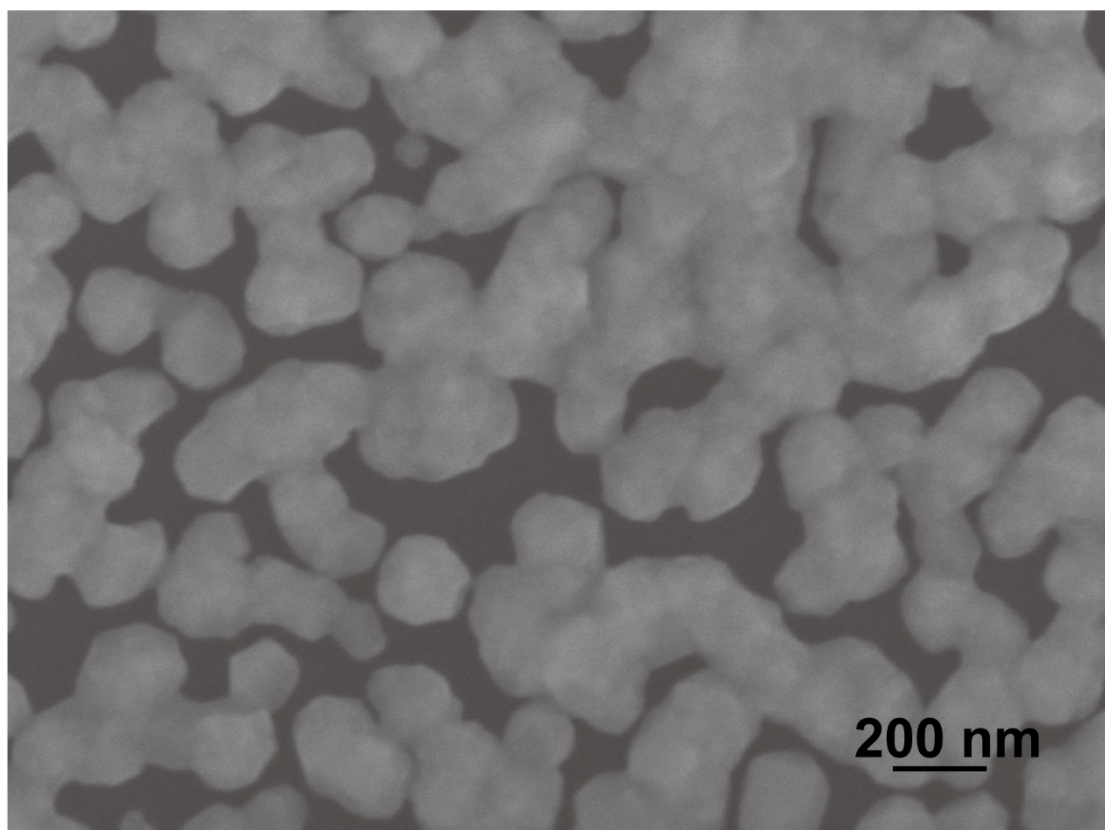

**Figure S2.** SEM image of AgNIs.

3. TEM images of CTAB coated AuNRs and polymer coated AuNRs.

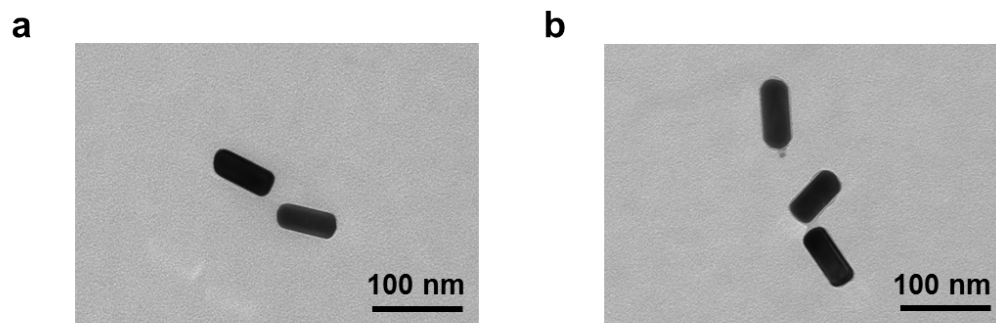

**Figure S3.** TEM image of (a) CTAB-coated AuNRs and (b) polymer-coated AuNRs

4. UV-Vis spectrums and Zeta-potential of CTAB-coated AuNRs and polymer-coated AuNRs.

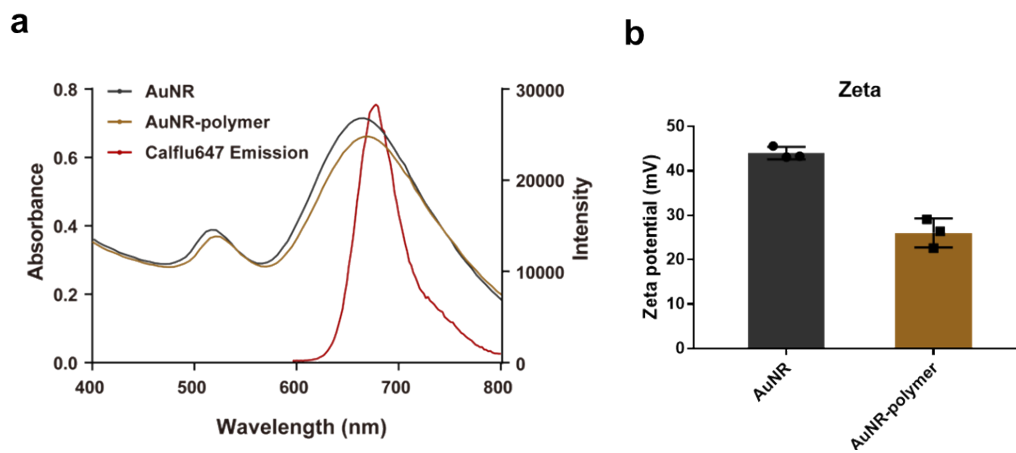

**Figure S4.** (a) UV-Vis spectrums and (b) Zeta-potential of CTAB-coated AuNRs and polymer-coated AuNRs.

5. Optimization of AuNRs coating times for the fabrication of plasmonic substrate.

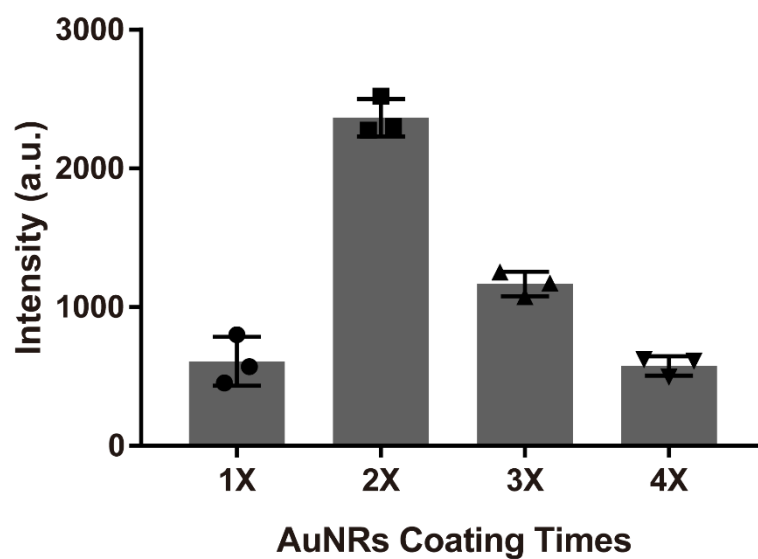

**Figure S5.** Fluorescence intensity on the plasmonic substrate with different AuNRs coating times.

6. SEM image and EDS mappings of AuNRs/AgNIs substrate.

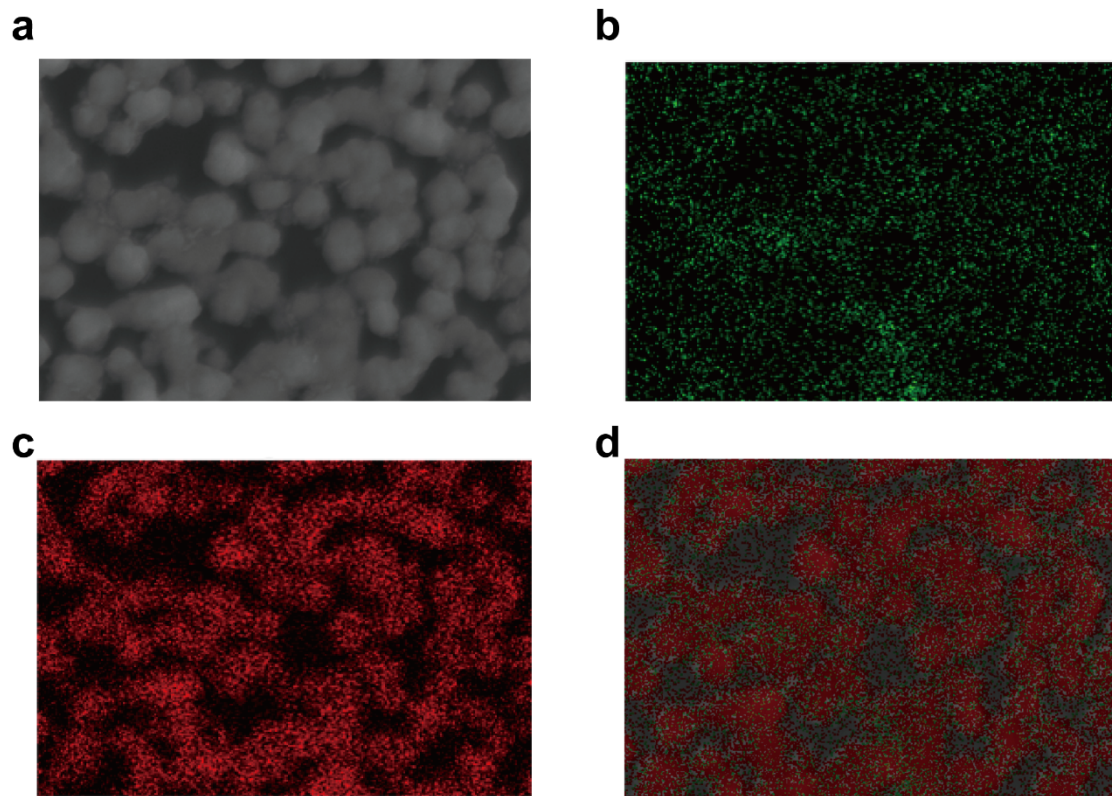

**Figure S6.** (a) SEM image of AuNRs/AgNIs substrate and EDS mapping (b) Au element (green) (c) Ag element (red) and (d) merge.



7. Fluorescence curves with the concentrations of alkynyl added.

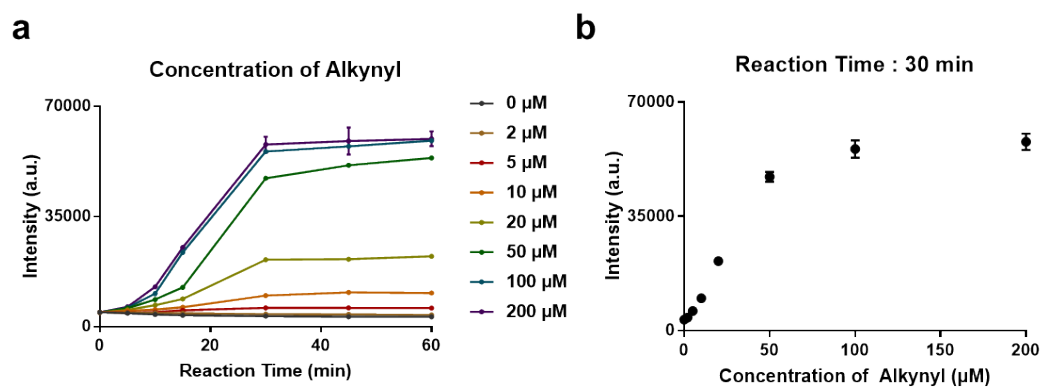

**Figure S7.** (a) Fluorescence curve with 0, 2, 5, 10, 20, 50, 100, 200  $\mu\text{M}$  of alkynyl added and (b) the endpoint intensity for 30-min-reaction.

8. Fluorescence curves under different pH.

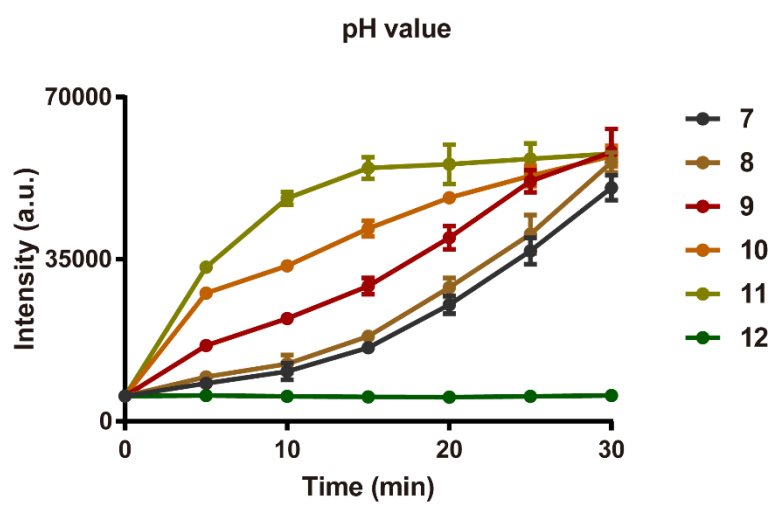

**Figure S8.** Fluorescence curve under pH 7, 8, 9, 10, 11, and 12.

9. Click-chemistry-based fluorescence probes for  $\text{Cu}^{2+}$  detection.

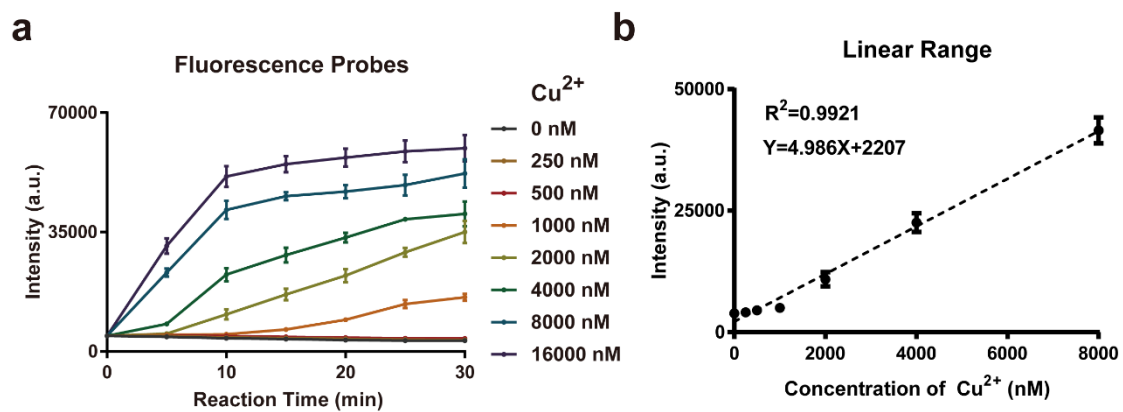

**Figure S9.** (a) Fluorescence curve for different concentrations of  $\text{Cu}^{2+}$  in click-chemistry-based sensing system. (b) The fitted line was based on the fluorescence intensity at 680 nm and the corresponding concentrations of  $\text{Cu}^{2+}$ .

10. Drying Temperature.

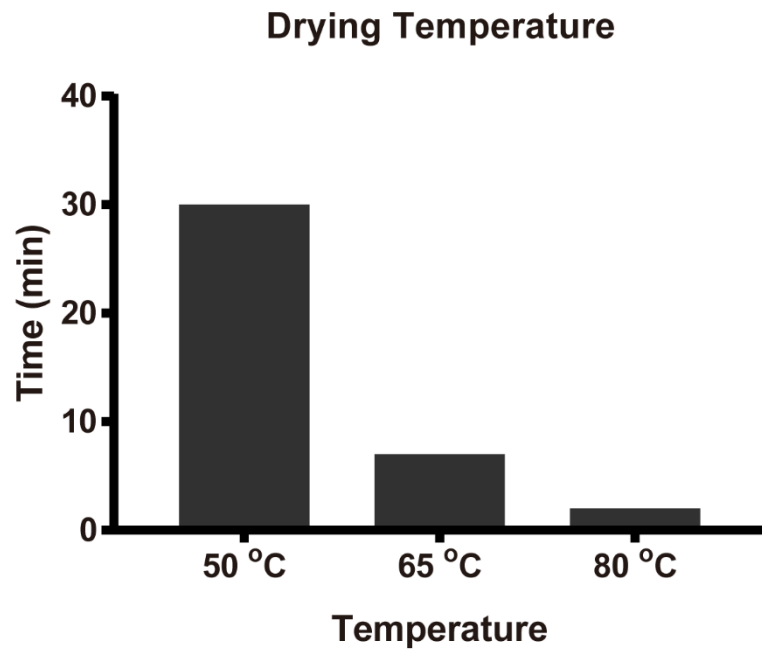

**Figure S10.** Time demand for drying under 50 °C, 65 °C and 80 °C.

11. Correlation analysis.

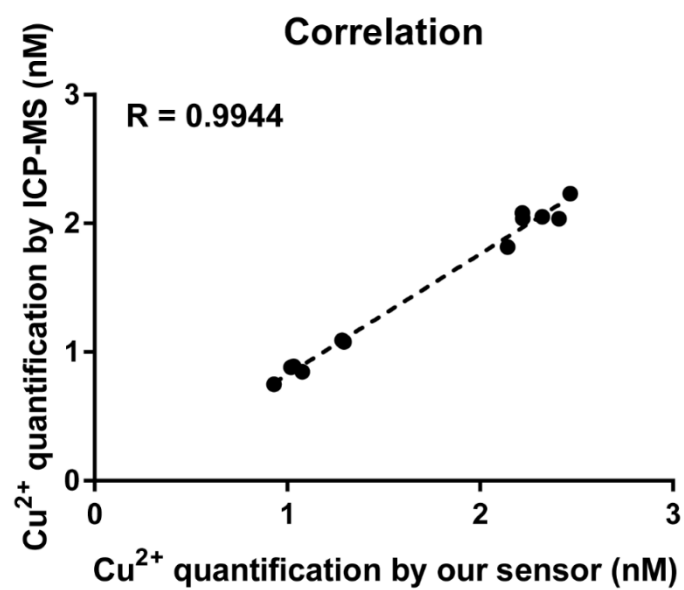

**Figure S11.** Correlation analysis for results of urinary copper quantification by our platform and ICP-MS.

12. Competitive effect for adsorbing  $\text{Cu}^{2+}$  by the *E. coli*.

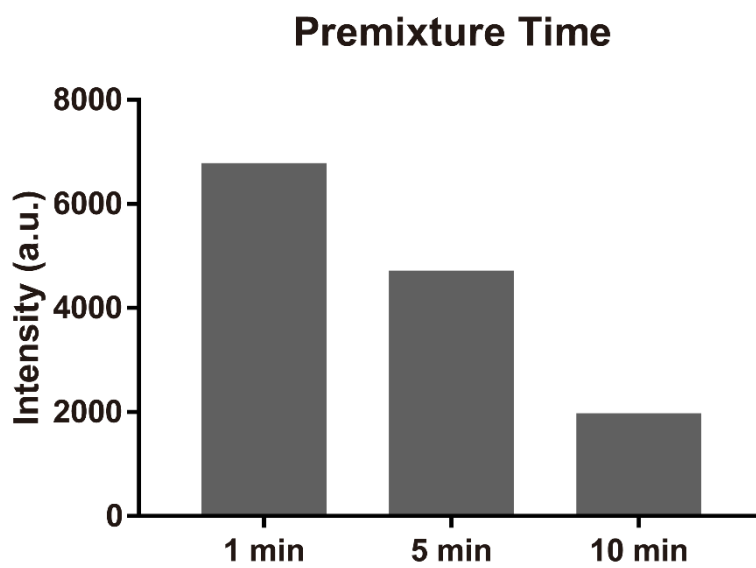

**Figure S12.** Intensity obtained using our platform of  $10 \mu\text{M}$   $\text{Cu}^{2+}$  premixed with  $5 \times 10^7$  CFU/mL *E. coli* for 1, 5, and 10 min.

13. Influence of different concentrations of Cef-susceptible *E. coli* and Cef-resistant *E. coli* for sensing system containing different amounts of copper ions.

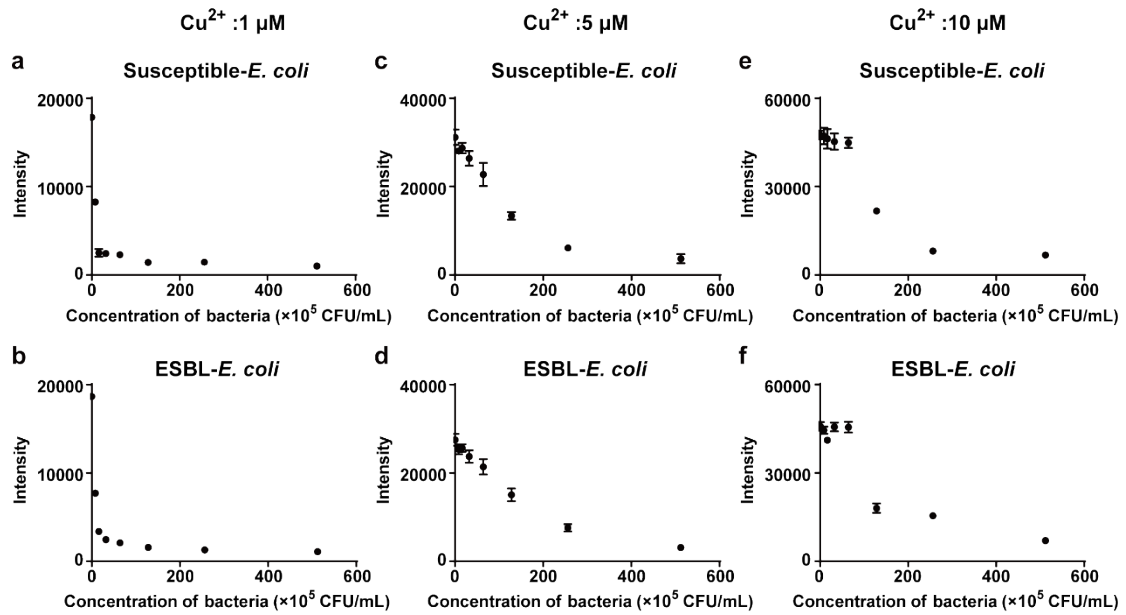

**Figure S13.** Calibration curves obtained by intensity change received by our platform for (a,b) 1  $\mu\text{M}$ , (c,d) 5  $\mu\text{M}$  and (e,f) 10  $\mu\text{M}$   $\text{Cu}^{2+}$  as a catalyst with different concentrations of added (a,c,e) Cef-susceptible *E. coli* and (b,d,f) Cef-resistant *E. coli*.

**Table S1.** Urinary copper detection by our sensor and ICP-MS.

|             | Our sensor ( $\mu\text{M}$ ) | ICP-MS ( $\mu\text{M}$ ) |
|-------------|------------------------------|--------------------------|
| Volunteer 1 | 0.89                         | 1.03                     |
| Volunteer 2 | 0.75                         | 0.93                     |
| Volunteer 3 | 0.88                         | 1.02                     |
| Volunteer 4 | 0.85                         | 1.08                     |
| Volunteer 5 | 1.09                         | 1.28                     |
| Volunteer 6 | 1.09                         | 1.29                     |
| Patient 1   | 2.05                         | 2.32                     |
| Patient 2   | 1.82                         | 2.14                     |
| Patient 3   | 2.04                         | 2.22                     |
| Patient 4   | 2.08                         | 2.22                     |
| Patient 5   | 2.23                         | 2.47                     |
| Patient 6   | 2.04                         | 2.41                     |

The test result of each subject was expressed as the average of more than three parallel experiments.



**Table S2.** Clinical UTI samples used in this study. “+” = positive, “-” = negative, GER = department of geriatrics, NEP = department of nephrology, SUR = department of pain clinical, CHI = department of traditional Chinese medicine, END = department of endocrinology, ORT = department of joint branch, DER = department of dermatology, ECU = department of emergency, ICU = intensive care unit, PED = department of pediatrics, URS = department of urology, ONC = department medical oncology, NEH = department of rehabilitation.

| Sample | Urine ID  | Department | Species        | Ceftriaxone<br>MIC (µg/mL) |
|--------|-----------|------------|----------------|----------------------------|
| 1      | 210716021 | GER        | <i>E. coli</i> | >32                        |
| 2      | 210908008 | NEP        | <i>E. coli</i> | >32                        |
| 3      | 211205001 | SUR        | <i>E. coli</i> | >32                        |
| 4      | 211006004 | CHI        | <i>E. coli</i> | >32                        |
| 5      | 210925002 | END        | <i>E. coli</i> | >32                        |
| 6      | 211015013 | ORT        | <i>E. coli</i> | >32                        |
| 7      | 210711016 | ORT        | <i>E. coli</i> | >32                        |
| 8      | 211206010 | NEP        | <i>E. coli</i> | >32                        |
| 9      | 210703003 | DER        | <i>E. coli</i> | >32                        |
| 10     | 210627025 | ECU        | <i>E. coli</i> | >32                        |
| 11     | 210826013 | PED        | <i>E. coli</i> | >32                        |
| 12     | 210713043 | PED        | <i>E. coli</i> | >32                        |
| 13     | 211207002 | END        | <i>E. coli</i> | ≤1                         |
| 14     | 210305004 | NEP        | <i>E. coli</i> | ≤1                         |
| 15     | 210411008 | GER        | <i>E. coli</i> | ≤1                         |
| 16     | 210103002 | END        | <i>E. coli</i> | ≤1                         |
| 17     | 211027001 | CHI        | <i>E. coli</i> | ≤1                         |
| 18     | 210206017 | CAR        | <i>E. coli</i> | ≤1                         |

|    |           |     |                |     |
|----|-----------|-----|----------------|-----|
| 19 | 210120036 | ECU | <i>E. coli</i> | <=1 |
| 20 | 210112003 | SUR | <i>E. coli</i> | <=1 |
| 21 | 210417027 | URS | <i>E. coli</i> | <=1 |
| 22 | 210305006 | END | <i>E. coli</i> | <=1 |

---

All the UTI samples were collected from Huazhong University of Science and Technology Union Shenzhen Hospital.

**Table S3.** Sensitivity and Specificity of AST for UTI samples using our sensor

| Bacteria       | AUC    | Cutoff | Sensitivity (%)    | Specificity (%)            | Accuracy (%)               |
|----------------|--------|--------|--------------------|----------------------------|----------------------------|
| <i>E. coli</i> | 0.9861 | 3231   | 100<br>(71.51-100) | 90.91<br>(58.72-<br>99.77) | 95.45<br>(77.16-<br>99.88) |

Ninety-five percent confidence intervals are indicated in parentheses.
